## CORRECTION

# Correction: Single cell expression analysis reveals anatomical and cell cycle-dependent transcriptional shifts during heart development

**Guang Li, Lei Tian, William Goodyer, Eric J. Kort, Jan W. Buikema, Adele Xu, Joseph C. Wu, Stefan Jovinge and Sean M. Wu**

There were errors in *Development* (2019) **146**, dev173476 (doi:10.1242/dev.173476).

In the supplementary information, the figures and legends were incorrectly matched.

In the original version, legends were presented in the correct order, but the figures themselves were in the following order: Fig. S7, Fig. S8, Fig. S9, Fig. S10, Fig. S11, Fig. S12, Fig. S1, Fig. S2, Fig. S3, Fig. S4, Fig. S5 and Fig. S6.

The online PDF has been updated.

We apologise to the authors and readers for this error, and for any inconvenience it may have caused.
